P4632

## Impact of intracardiac thrombosis in patients with acute myocardial infarction: insights from nationwide inpatient sample in the United States

S. Dayanand<sup>1</sup>, A. Amanullah<sup>1</sup>, J. Martinez Castellanos<sup>2</sup>, A. Goyal<sup>1</sup>, C. Jeannette<sup>1</sup>, J. George<sup>1</sup>, J. Rangaswami<sup>1</sup><sup>1</sup>Albert Einstein Medical Center, Philadelphia, United States of America; <sup>2</sup>Mercy Philadelphia Hospital, Cardiology, Philadelphia, United States of America

**Background:** Intracardiac thrombosis (ICT) is a complication of Acute myocardial infarction (AMI).

**Hypothesis:** Our aim was to evaluate the impact of ICT on mortality, thromboembolism, length of stay in patients with AMI.

**Methods:** Data was collected from the Nationwide Inpatient Sample (NIS) for the year 2016, where patients with a primary diagnosis of ICT as a complication of AMI (ICD10-CM code I23.6) were included. Comparisons were made between patients with ICT post-AMI (ICD10-CM code I23.6) vs those with AMI (ICD10-CM I21.0).

**Results:** Of a total of 200930 cases of AMI, 488 (0.5%) had ICT. The patients with ICT had an increased length of stay (LOS) (8.5±9.8 vs 5.7±7.4 days; p<0.001), increased ischemic stroke (10.6% vs 2.9%; p<0.001), and cardiogenic shock (15% vs 7%; p<0.001). There was no difference in mortality between the groups.

**Conclusion:** ICT as a complication of AMI is associated with increased hospital LOS and adverse events.

Table 1. Patient characteristics

|                                           | AMI% (n=200,930) | ICT post AMI% (n=488) | p-values |
|-------------------------------------------|------------------|-----------------------|----------|
| Demographic variables                     |                  |                       |          |
| a. Males                                  | 59               | 73                    |          |
| b. Females                                | 41               | 27                    | <0.001   |
| Race                                      |                  |                       |          |
| a. Caucasian                              | 71               | 68                    | 0.10     |
| b. African American                       | 11               | 15                    | 0.01     |
| c. Hispanic                               | 7.5              | 6.1                   | 0.23     |
| d. Other races                            | 5.6              | 6.2                   | 0.80     |
| e. Race not specified                     | 4.4              | 4.9                   | 0.59     |
| Comorbidities                             |                  |                       |          |
| Drug abuse                                | 23.9             | 31.1                  | <0.001   |
| Atrial Arrhythmias                        | 33.1             | 41.6                  | <0.001   |
| Ventricular Arrhythmias                   | 5.6              | 9.2                   | <0.001   |
| Chronic pulmonary disease                 | 27.7             | 21.1                  | <0.001   |
| Diabetes Mellitus                         | 38.9             | 31.1                  | <0.001   |
| Hypertension                              | 81.2             | 70.2                  | <0.001   |
| Peripheral Vascular disease               | 10.5             | 3.52                  | <0.001   |
| Current or past smoker                    | 20.5             | 26.1                  | <0.001   |
| Chronic kidney disease                    | 28.1             | 20.4                  | <0.001   |
| History of coronary artery bypass surgery | 10.6             | 5.9                   | <0.001   |
| HFrEF                                     | 23.3             | 50                    | <0.001   |

HFrEF = Heart failure with reduced ejection fraction; pVAD = Percutaneous ventricular assist device.
